# Supplementary material
Source: publisher figshare collection journal article supplement (https://acs.figshare.com/ndownloader/files/4307401)
Supplement: Supplementary file 1 [file 4307401]

## S.1 Optimization results

NCPF Yield of lithiation-fluoroacetylation of N-(4-chlorophenyl)-pivalamide (NCP) at different temperatures  
(DME-Toluene (V/V: 15/7) solvent mixture, [NCP] = 0.22M,  $f_{\text{BuLi}}$  = 1 mL/min,  
waiting time between BuLi and TFAEt dosing: 60 min.)

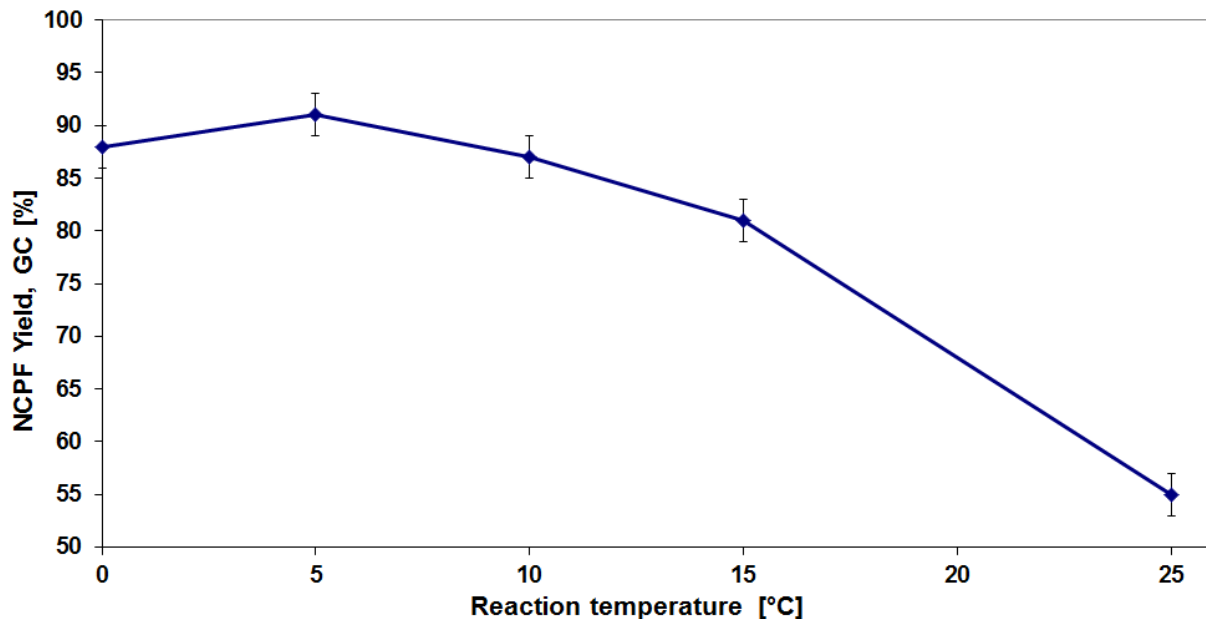

NCPF Yield of lithiation-fluoroacetylation of N-(4-chlorophenyl)-pivalamide (NCP) as function of  
waiting time between BuLi and TFAEt dosing and NCP concentration  
(DME-Toluene (V/V: 15/7) solvent mixture,  $f_{\text{BuLi}}$  = 1 mL/min)

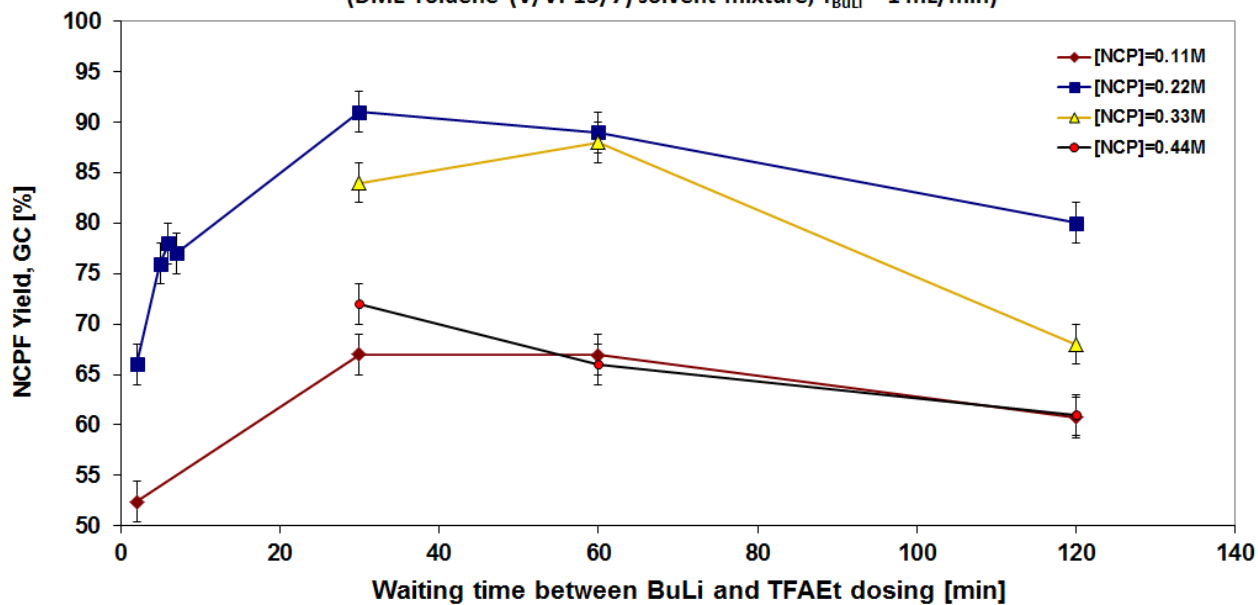

## S.2: reference spectra

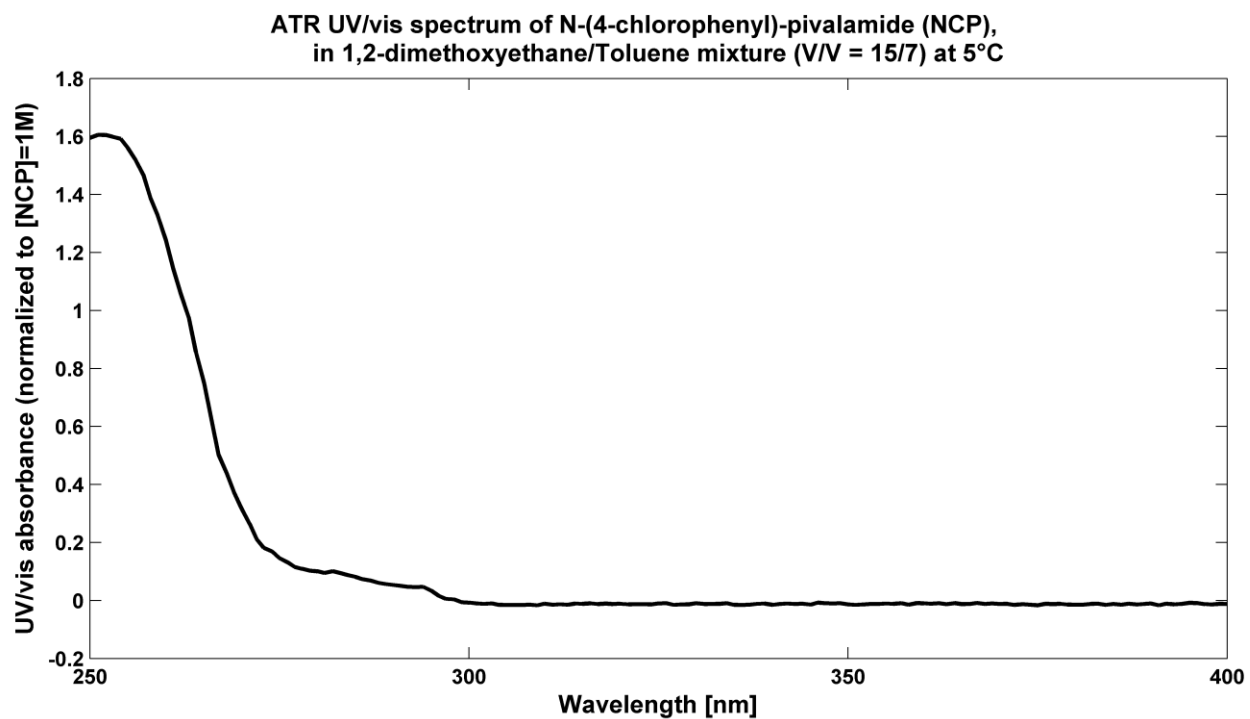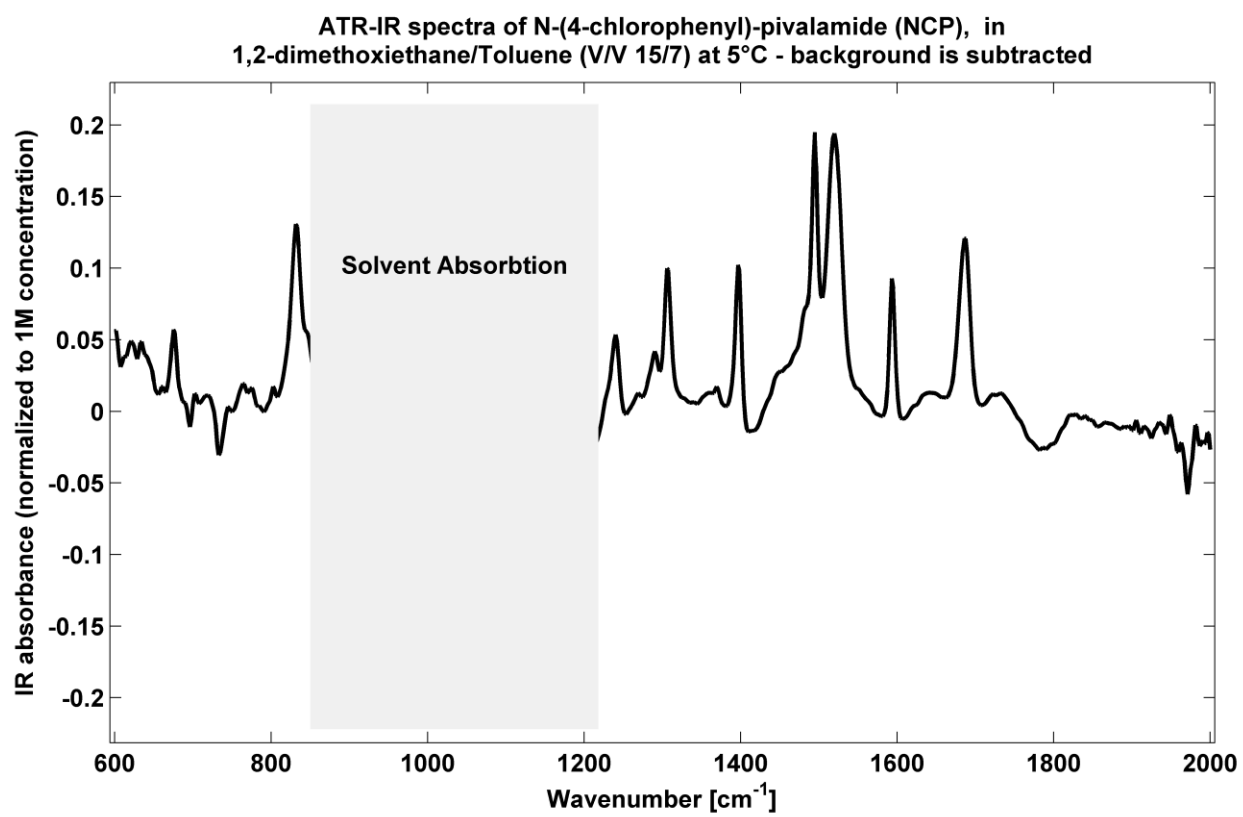

ATR-IR spectrum of 1,2-dimethoxyethane at 5°C (normalized to 1.0M concentration, neat, liquid)

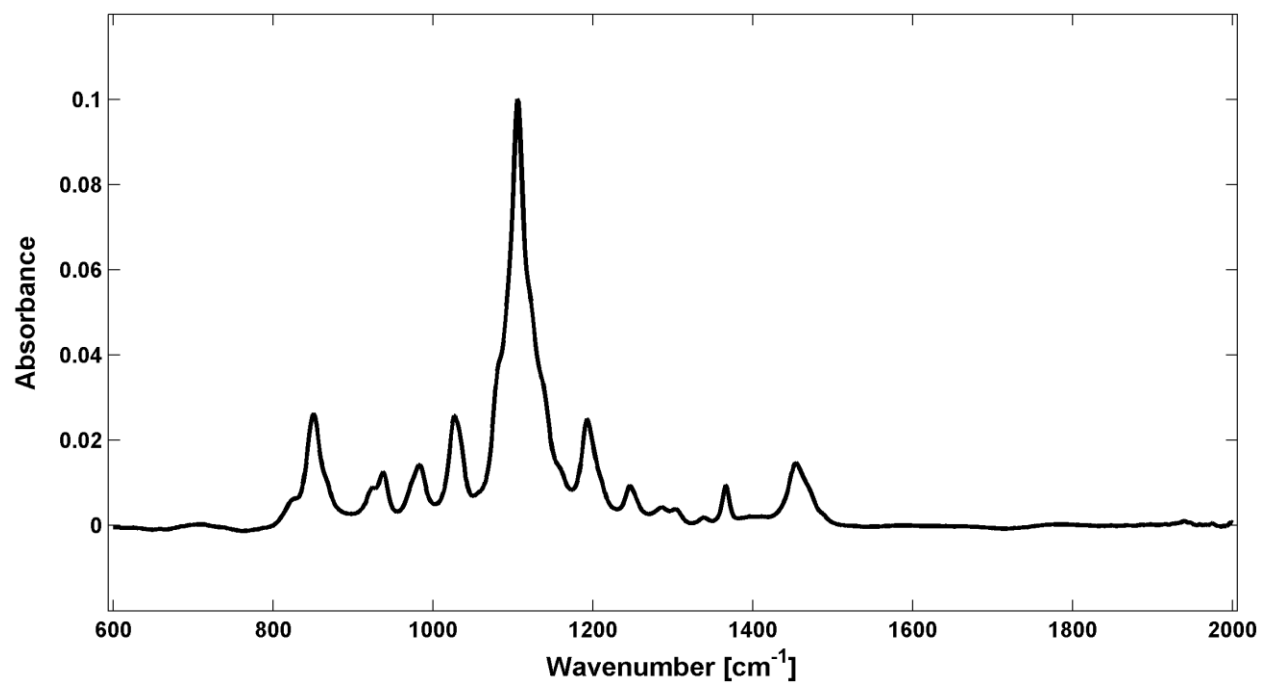

ATR-IR spectra of toluene at 5°C (normalized to 1.0M concentration, neat, liquid)

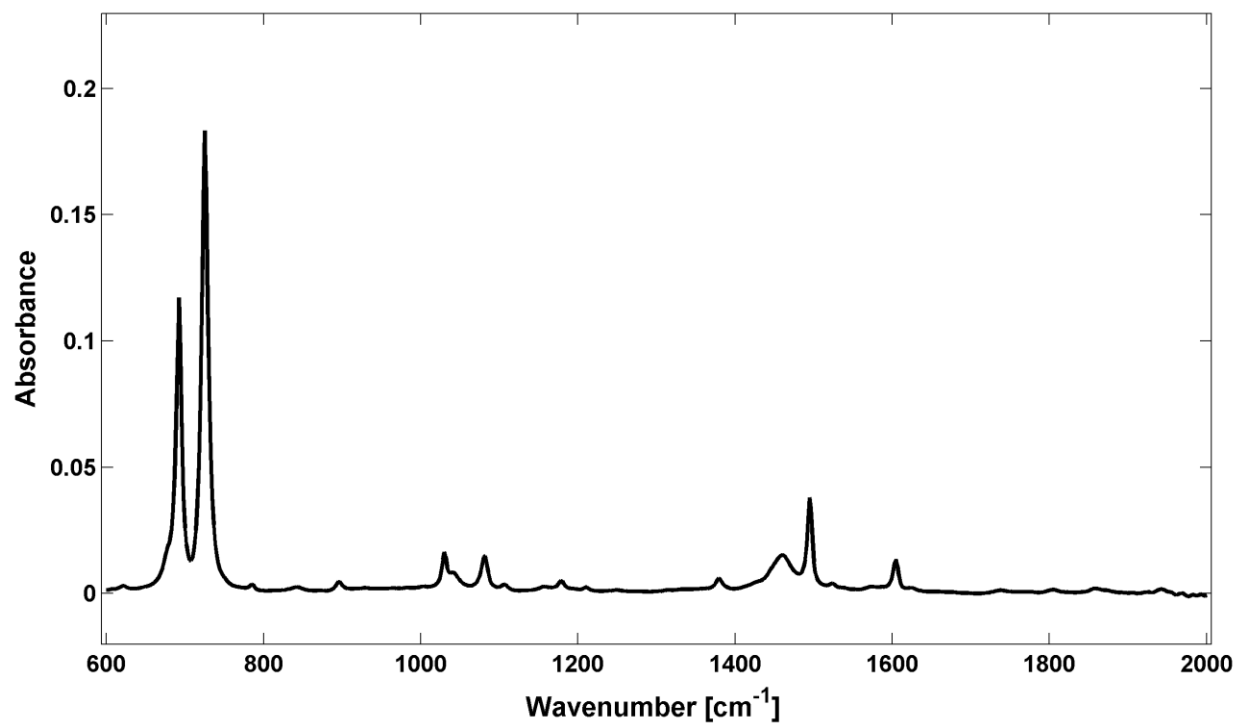

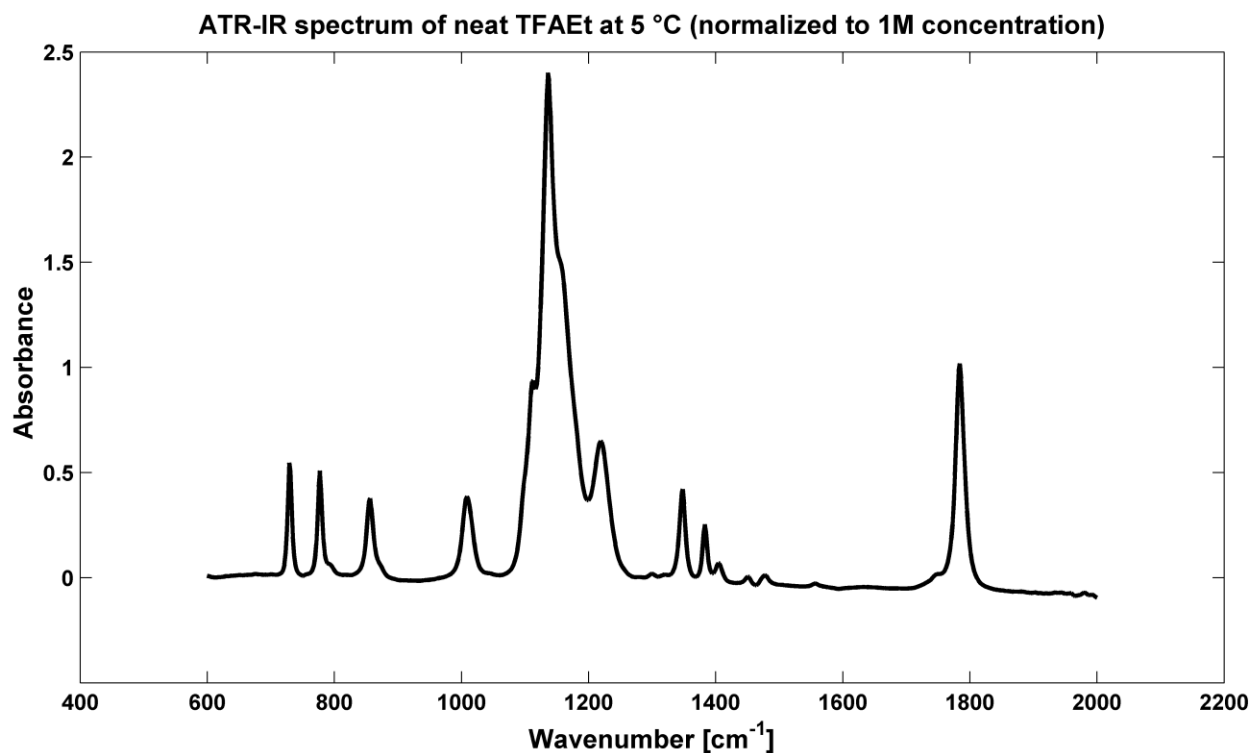

S.3 IR absorbance profiles recorded during fluoroacetylation (a) and hydrolysis (b) latter indicating the NCPF product formation:

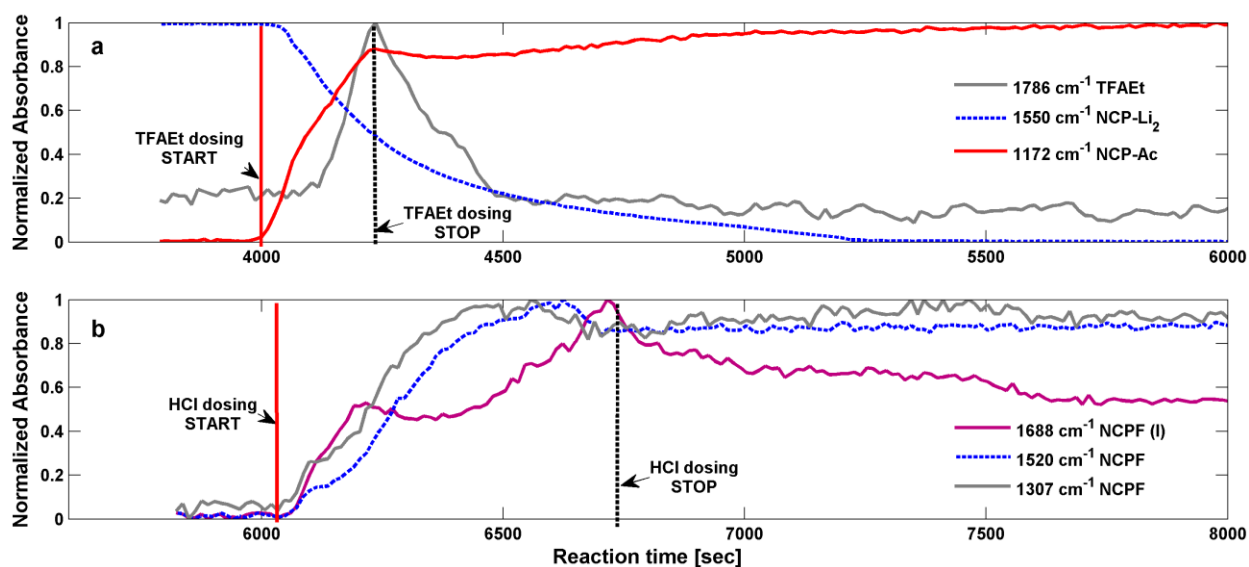

#### S.4 Sample Matlab code for fitting first order reaction model for the fluoroacetylation step:

##### Model:

$$[\text{NCP-Li}_2] = [\text{NCP-Li}_2]_0 \cdot e^{-k \cdot t} \Rightarrow \text{Abs}_{\text{NCP-Li}_2} = (\text{baseline}) + \text{Abs}_{\text{NCP-Li}_2,0} \cdot e^{-k \cdot t}$$

Where:

- $k$  is the apparent rate constant
- $[\text{NCP-Li}_2]$  is the NCP-Li<sub>2</sub> concentration at  $t$  seconds after the start of TFAEt dosing,
- $[\text{NCP-Li}_2]_0$  is the (initial) NCP-Li<sub>2</sub> concentration, at the start of TFAEt dosing,
- $\text{Abs}_{\text{NCP-Li}_2}$  is the absorbance related to NCP-Li<sub>2</sub>, measured at time  $t$  at IR-bands IIb, III, V, VI and IX (Table 1)
- $\text{Abs}_{\text{NCP-Li}_2,0}$  is the (initial) absorbance related to NCP-Li<sub>2</sub>, measured at IR-bands IIb, III, V, VI and IX (Table 1), at the start of TFAEt dosing,

##### Matlab:

1. Define objective function:

```
function ObjectiveFunction = fit_simp(x,X,Y)
A=x(1);
B=x(2);
C=x(3);

ObjectiveFunction = A + B.*exp(C.*X) - Y;
```

2. Fit and visualize data:

```
% Initialize coefficients of the function fit_simp:
X0=[mean(irmat2(i,:)) (max(irmat2(i,:))-min(irmat2(i,:))) -
2/(max(t) - min(t))];

% Calculate the new coefficients using LSQNONLIN:
options = optimset('Largescale','off');
x=lsqnonlin(@fit_simp,X0,[],[],options,X,Y);

% Plot the original and experimental data.
y_new=fit_simp(x,X,Y)+Y;
plot(X,Y,'or',X,y_new,'b')

%Apparent first order rate constant:
k=-x(3);
```

## S.5 Yield calculation from the GC/FID data via internal standard method

Five standard solutions of NCP and NCPF in 10 mL DME/Toluene (V/V=15/7) mixture were measured using GC/FID for calibration, the solutions were:

|          | Solution #1   |                     | Solution #2   |                     | Solution #3   |                     |
|----------|---------------|---------------------|---------------|---------------------|---------------|---------------------|
|          | mass<br>[mg]* | Area (GC)<br>[pA·s] | mass<br>[mg]* | Area (GC)<br>[pA·s] | mass<br>[mg]* | Area (GC)<br>[pA·s] |
| NCP      | 174           | 6784                | 520           | 16762               | 345           | 11408               |
| NCPF     | 503           | 10501               | 200           | 4219                | 331           | 6955                |
| Dibenzyl | 104           | 5284                | 41            | 2106                | 19            | 948                 |

  

|          | Solution #4   |                     | Solution #5   |                     |
|----------|---------------|---------------------|---------------|---------------------|
|          | mass<br>[mg]* | Area (GC)<br>[pA·s] | mass<br>[mg]* | Area (GC)<br>[pA·s] |
| NCP      | 0             | 1334                | 489           | 15581               |
| NCPF     | 497           | 10950               | 0             | 0                   |
| Dibenzyl | 49.8          | 2659                | 23            | 1172                |

\* added weight, the NCPF standard contains about 10% NCP

### S.5/a determination of NCP content of the NCPF standard via standard addition.

As seen from the GC/FID results for solution #4 (no added NCP), the NCPF standard contains a significant amount of NCP. Therefore the amount of NCP impurity has to be determined, based on the standard addition method (equations 1.1 - 1.3).

For a chosen solution “i”:

$$\frac{A_{\text{NCP},i}}{A_{\text{NCPF},i}} = \frac{y_{\text{NCP}}}{y_{\text{NCPF}}} \cdot \frac{c_{\text{NCP},i}}{c_{\text{NCPF},i}} = y_{\text{rel}} \cdot \frac{M_{\text{NCPF}} \cdot m_{\text{NCP},i}^{\text{total}}}{M_{\text{NCP}} \cdot m_{\text{NCPF},i}^{\text{total}}} = y_{\text{rel}} \cdot \frac{M_{\text{NCPF}} \cdot (m_{\text{NCP},i} + r \cdot m_{\text{NCPF},i})}{M_{\text{NCP}} \cdot m_{\text{NCPF},i} (1-r)} \quad 1.1$$

For an other chosen solution “j”:

$$\frac{A_{\text{NCP},j}}{A_{\text{NCPF},j}} = y_{\text{rel}} \cdot \frac{M_{\text{NCPF}} \cdot (m_{\text{NCP},j} + r \cdot m_{\text{NCPF},j})}{M_{\text{NCP}} \cdot m_{\text{NCPF},j} (1-r)} \quad 1.2$$

Where:

- $A_{\text{xxx}}$  is the corresponding area measured with GC
- $m_{\text{xxx}}^{\text{total}}$  is the total weight of the corresponding species in the solution
- $m_{\text{xxx}}$  is the added weight of the corresponding species
- $M_{\text{xxx}}$  is the molecular weight of the corresponding species
- $y_{\text{xxx}}$  is the sensitivity of the GC system to the corresponding species
- $y_{\text{rel}}$  is the relative sensitivity of the GC system to NCP versus NCPF
- $r$  is the weight percentage of NCP in the NCPF standard

If  $L = \frac{A_{NCP,i}}{A_{NCPF,i}} \cdot \frac{A_{NCPF,j}}{A_{NCP,j}}$ , after division of equation 1.1 by equation 1.2:

$$r = \frac{m_{NCP,i} \cdot m_{NCPF,j} - L \cdot m_{NCPF,i} \cdot m_{NCP,j}}{L \cdot m_{NCPF,i} \cdot m_{NCPF,j} - m_{NCPF,i} \cdot m_{NCP,j}} \quad 1.3$$

Considering all the  $\binom{5}{2} = 10$  combinations, we received that there is  $100 \cdot r = \underline{\underline{8.3 \pm 1 \% \text{ w/w}}}$

**NCP content in the NCPF standard** (68% confidence level). Since there are no other significant impurities, purity of the NCPF used for internal standard calibration is  $100 \cdot (1-r) = 91.7 \pm 1 \%$ .

S.5/b Determination of the response factor  $y^*$  of NCPF and NCP versus dibenzyl for the internal standard calibration

For a chosen solution “i”:

$$\frac{A_{S,i}}{A_{DB,i}} = y_s \cdot \frac{M_{DB} \cdot m_{S,i}}{M_s \cdot m_{DB,i}} \quad 1.4$$

Where:

- $y_s$  is the response factor of species S (NCPF or NCP) versus dibenzyl
- $A_{DB}$  is the peak area corresponding to dibenzyl
- $M_{DB}$  is the molecular weight of dibenzyl
- $M_s$  is the molecular weight of species S (NCPF or NCP)
- $m_s$  is the total weight of species S in the solution (in case of NCPF  $m_{NCPF, total} = (1-r) \cdot m_{NCPF}$ , in case of NCP,  $m_{NCP, total} = m_{NCP} + r \cdot m_{NCPF}$ )

For convenience, we incorporate the molecular weights into the response factor, thus we can calculate with weights:

$$y_s^* = y_s \cdot \frac{M_{DB}}{M_s} \quad 1.5$$

As shown below,  $y_s^*$  values can be determined as slopes of the  $A_S/A_{DB} = y_s^* m_S/m_{DB} + b$  functions. The corresponding values to NCP and NCPF:

$$y_{NCPF}^* = 0.463 \text{ and } y_{NCP}^* = 0.612$$

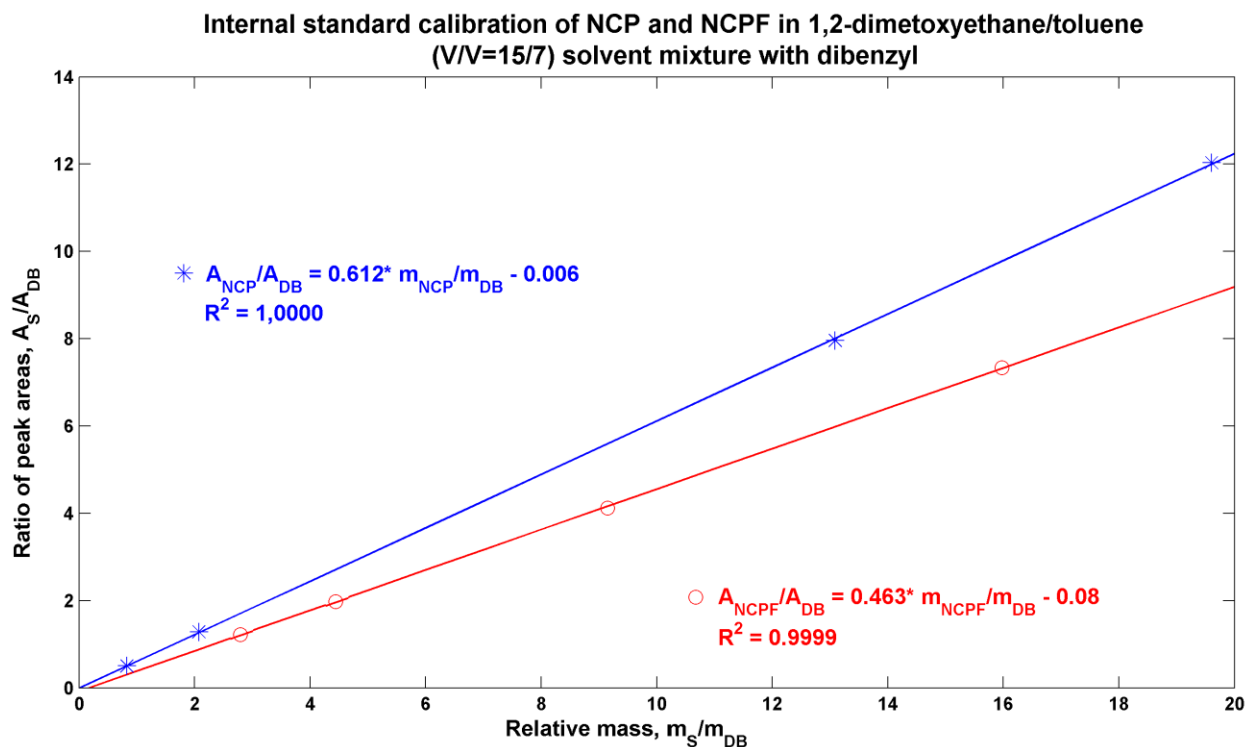

### S.5/c Calculation of the yield and the remaining NCP content

The mass of species S (NCP or NCPF) in the reaction mixture, after hydrolysis and neutralization:

$$m_S = \frac{A_S \cdot m_{\text{DB}}}{y_S^* A_{\text{DB}}} \quad 1.6$$

Example GC result:

Measurement ID: GT\_110310, measurement date: 11.03.2010

Conditions: reagent amounts BuLi/BuLi/TFAET/HCl = 2.15/0.15/1.3/2.25 NCP equivalents, [NCP] = 0.22M, solvent: DME/Toluene (V/V = 15/7), waiting times after dosing steps: 60/10/30/10 min,  $f_{\text{BuLi}}/f_{\text{TFAET}}/f_{\text{HCl}} = 1.0/0.2/0.2$  mL/min,  $T_{\text{react}} = 5^\circ\text{C}$ , stirrer speed: 600 rpm.

| Species  | Retention time [min] | Area [pA*s] | Weight [mg]  | Y (mol/mol initial NCP) |
|----------|----------------------|-------------|--------------|-------------------------|
| Dibenzyl | 8.852                | 1527        | 100.6        |                         |
| NCPF     | 9.294                | 10422       | <b>1483*</b> | <b>96.45</b>            |
| NCP      | 9.71                 | 308         | <b>33.2*</b> | <b>3.13</b>             |

\* calculated according to equation 1.6
